# Supplementary material
Source: HighWire-hosted journal article supplement (https://genome.cshlp.org/content/suppl/2004/04/07/13.3.455)

|            |                                                      |                                       |                                              |                                                  |              |                                        |              |                                        |
|------------|------------------------------------------------------|---------------------------------------|----------------------------------------------|--------------------------------------------------|--------------|----------------------------------------|--------------|----------------------------------------|
| Subtree    | Cluster size is 108, joined at the distance 0.162572 |                                       |                                              |                                                  | 1:7          |                                        |              |                                        |
| Spot size: | Width:                                               | <input type="text" value="Autom."/>   | Height:                                      | <input type="text" value="Autom."/>              | Tree height: | <input type="text" value="Automatic"/> | Show titles: | <input type="button" value="Redraw!"/> |
|            | <input type="text" value="Autom."/>                  |                                       |                                              |                                                  |              |                                        |              |                                        |
| Colors     | <input type="text" value="Colors"/>                  | <input type="text" value="NA color"/> | <input type="text" value="Number of slots"/> | <input type="text" value="Discretisation type"/> |              |                                        |              |                                        |

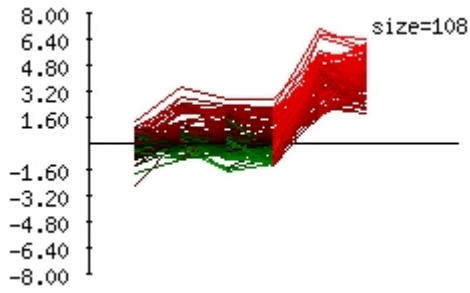

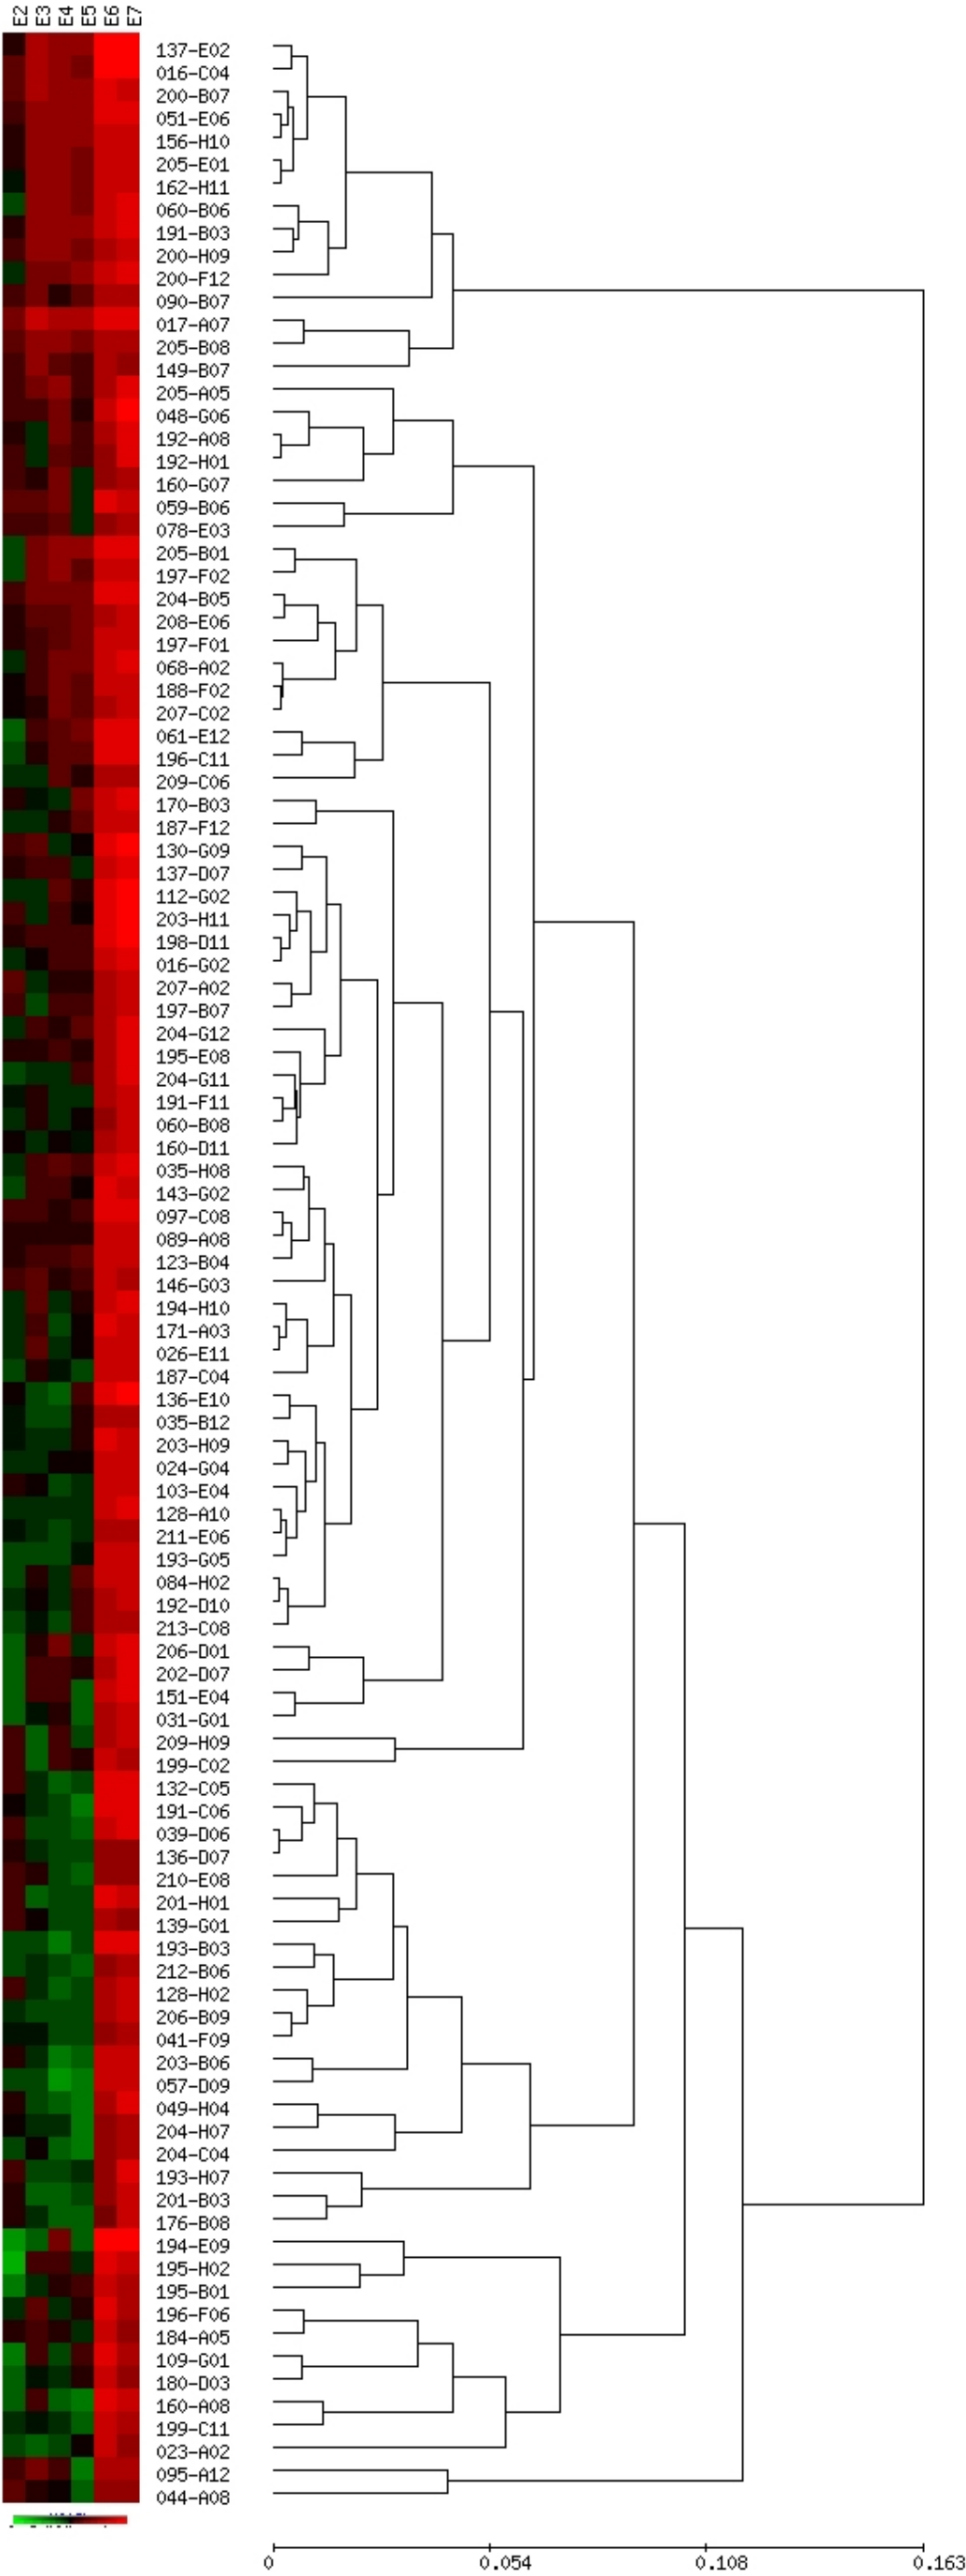

Supplement: Figure_6_SVM_result.pdf [file Figure_6_SVM_result.pdf]
